# Supplementary material for: A cannabidiol aminoquinone derivative activates the PP2A/B55α/HIF pathway and shows protective effects in a murine model of traumatic brain injury
Source: PubMed Central journal article supplement (PMC9270745; doi:10.1186/s12974-022-02540-9), 2022-07-09
Supplement: 12974_2022_2540_MOESM1_ESM.pdf [file 12974_2022_2540_MOESM1_ESM.pdf]

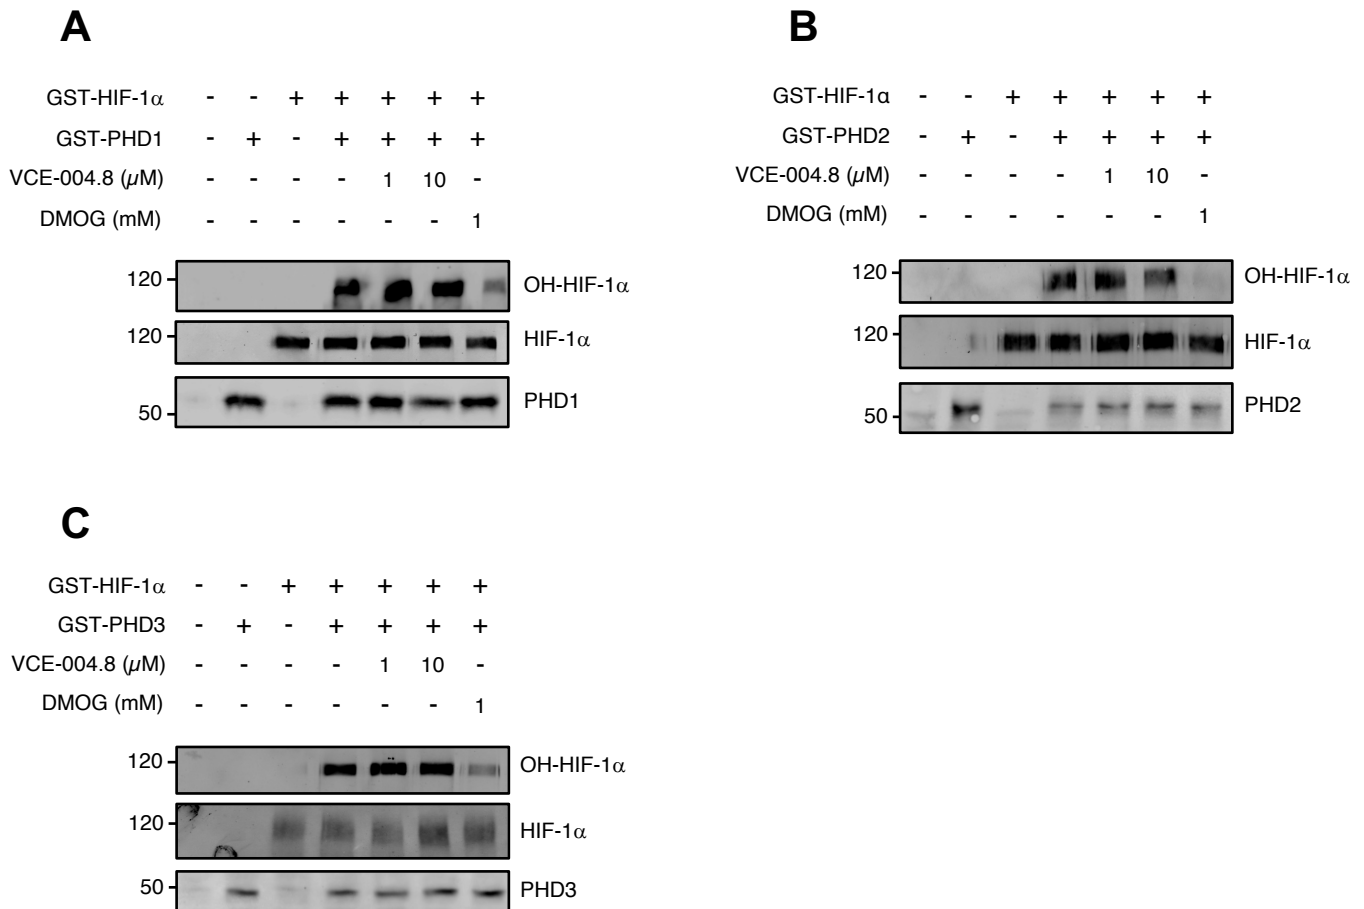

**Figure Supplementary 1. Effect of VCE-004.8 on HIF-1 $\alpha$  hydroxylation mediated by PHDs.** (A-C) HIF-1 $\alpha$  *in vitro* hydroxylation reaction was carried out employing recombinant human HIF-1 $\alpha$  and PHDs proteins, obtained according to standard protocols in BL21 bacterial cells and purified using Glutathione-Sepharose 4B (GE Healthcare). Proteins were incubated in the reaction buffer 50 mM Tris/HCl (pH 7.5), 1 mM DTT, 50  $\mu$ M FeSO<sub>4</sub>, 5 mM ascorbate, and 200  $\mu$ M oxoglutarate for 1 hour at 30°C, in the presence of different concentrations of VCE-004.8 and using DMOG as positive control. The prolyl hydroxylation reaction was stopped by adding Laemmli sample buffer and hydroxylation levels as well as total HIF-1 $\alpha$  and PHDs signals were analyzed by western blot.

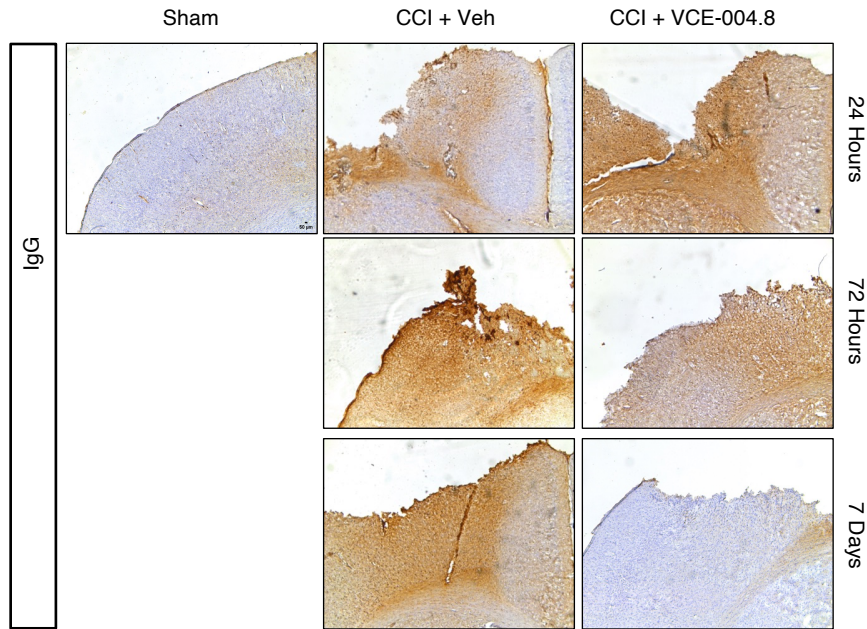

**Figure Supplementary 2. Effect of VCE-004.8 on peripheral IgG infiltration into the brain.** Representative immunohistochemically images of peripheral IgG infiltration in the pericontusional cortex after the brain injury. Scale bar equivalent to 50  $\mu$ m.

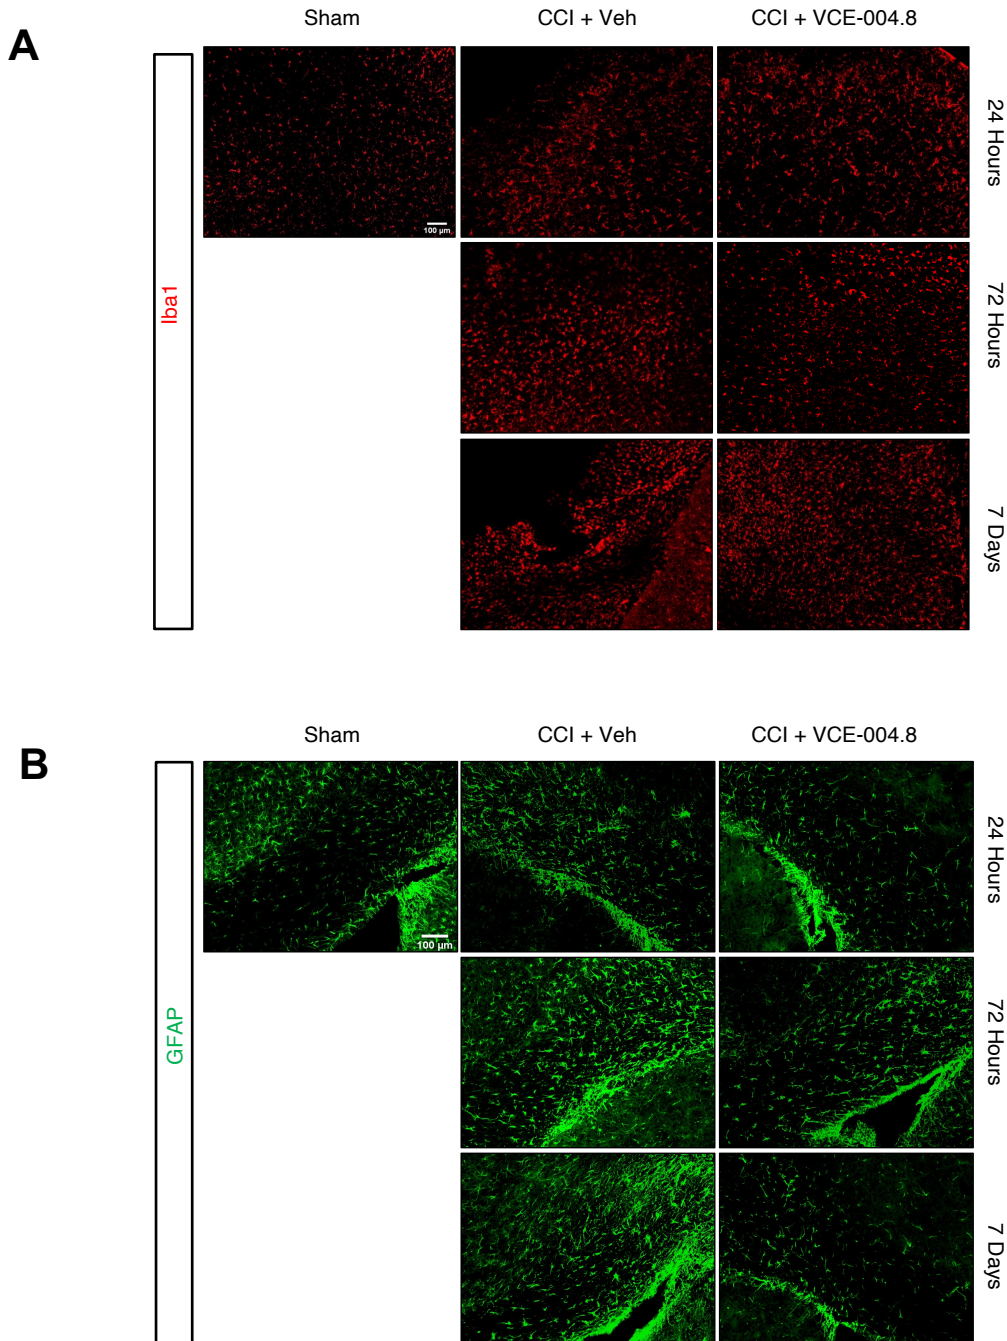

**Figure Supplementary 3. Effect of VCE-004.8 on glia reactivation after TBI.** (A) Representative confocal images showing Iba1<sup>+</sup> cells in pericontusional cortex at 24 hours, 72 hours and 7 days after the brain injury. (B) Representative confocal images showing GFAP<sup>+</sup> cells in Corpus Callosum at 24 hours, 72 hours and 7 Days post CCI. Scale bars equivalent to 100  $\mu$ m.

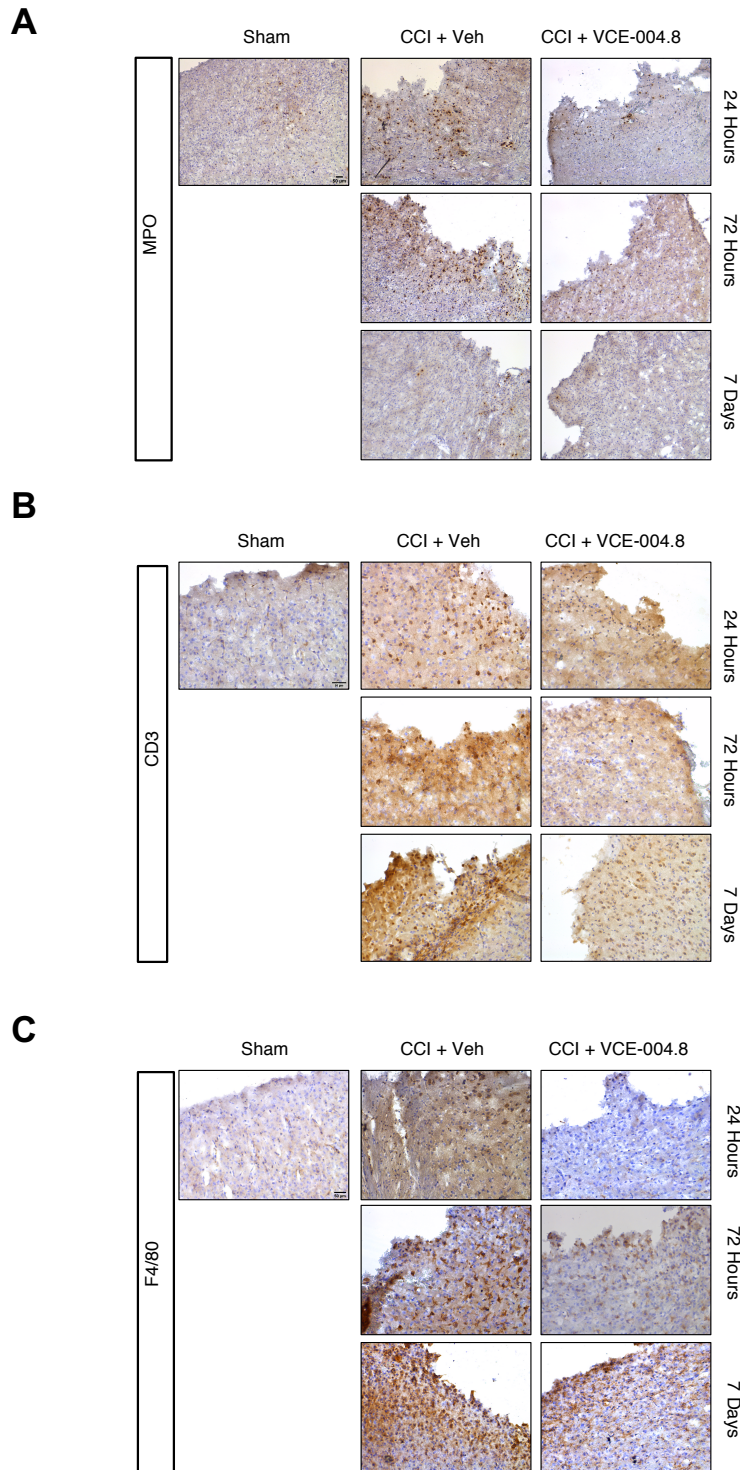

**Figure Supplementary 4. Effect of VCE-004.8 on peripheral immune cells infiltration after TBI.** Representative immunohistochemically images of neutrophils (MPO, A), T cells (CD3, B) and macrophages (F4/80, C) in the pericontusional cortex after the brain injury. Scale bars equivalent to 50  $\mu$ m.

**A**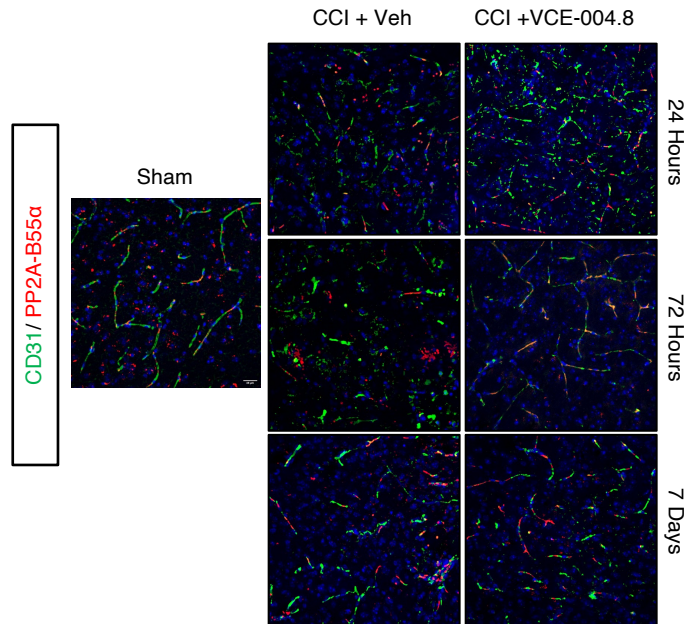**B**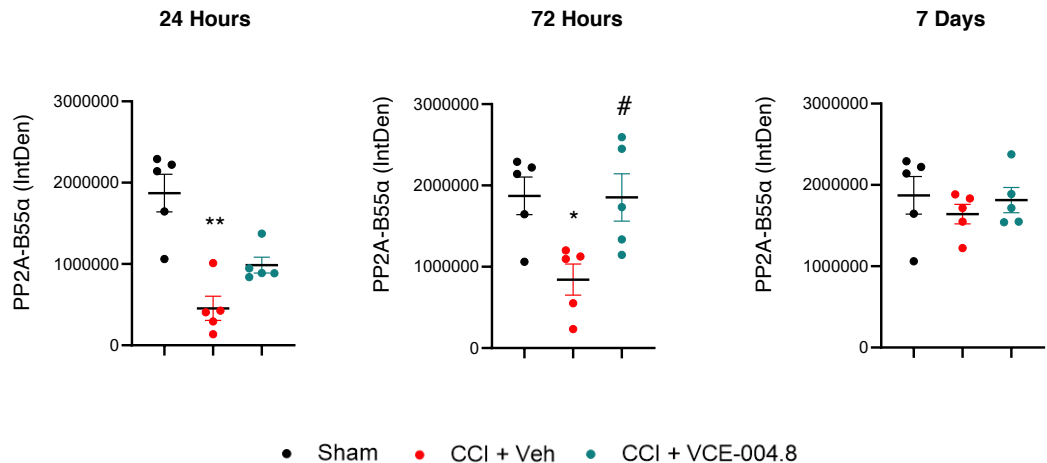

**Figure Supplementary 5. Effect of VCE-004.8 on PP2A-B55 $\alpha$  expression after TBI.** (A) Representative confocal images for CD31 and PP2A-B55 $\alpha$  expression in the pericontusional cortex at 24 hours, 72 hours and 7 days after the brain injury. Scale bar equivalent to 25  $\mu$ m. (B) The quantification of PP2A-B55 $\alpha$  (Integrated Density) is represented as mean  $\pm$  SEM, and significance was determined by one-way ANOVA followed by the Tukey's post hoc test or Kruskal-Wallis post hoc test. 24 hours:  $p=0.0044$ ; \* $p<0.05$  CCI + Vehicle vs Sham, 72 hours:  $p<0.0268$ ; \* $p<0.05$  CCI + Vehicle vs Sham;  $p=0.0297$ ; # 0.05 CCI + VCE-004.8 vs CCI + Vehicle.

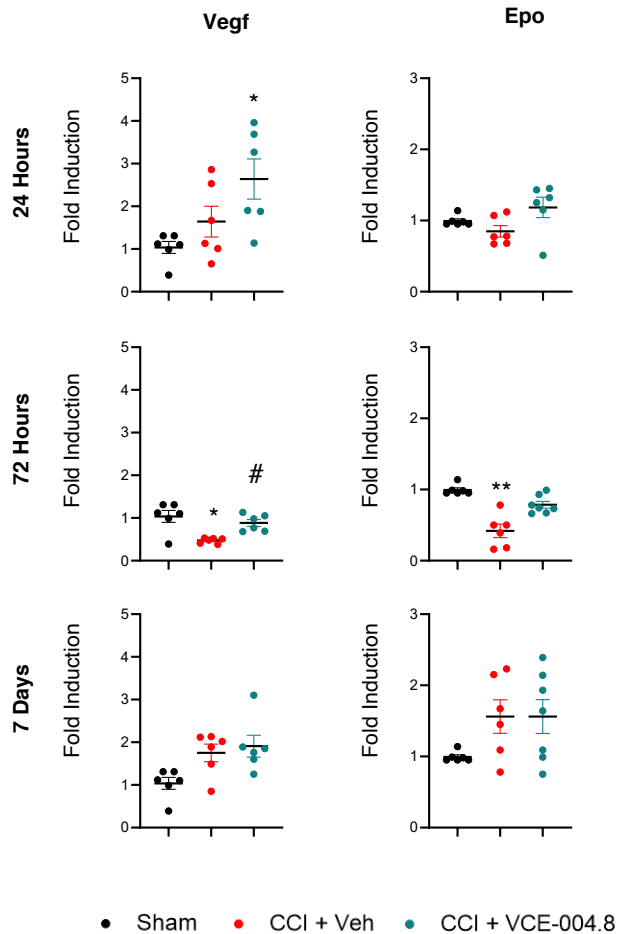

**Figure Supplementary 6. Effect of VCE-004.8 on the expression of HIF-1 $\alpha$ -dependent genes.** The mRNA expression for Vegf and Epo in the pericontusional cortex was quantified by qPCR and normalized versus Ppia at 24 hours, 72 hours and 7 days. Data are represented as mean  $\pm$  SEM, and significance was determined by one-way ANOVA followed by the Tukey's post hoc test or Kruskal-Wallis post hoc test. Vegf (24 hours:  $p= 0.0333$ ; \* $p<0.05$  CCI + VCE-004.8 vs Sham, 72 hours:  $p= 0.0171$  \* $p<0.05$  CCI + Vehicle vs Sham,  $p= 0.04046$ ; # $p<0.05$  CCI + VCE-004.8 vs CCI + Vehicle). Epo (72 hours:  $p= 0.0065$ ; \*\* $p<0.01$  CCI + Vehicle vs Sham).
